# Supplementary material for: Drp1/Fis1 interaction mediates mitochondrial dysfunction, bioenergetic failure and cognitive decline in Alzheimer's disease
Source: PubMed Central journal article supplement (PMC5814200; doi:10.18632/oncotarget.23640), 2017-12-22
Supplement: oncotarget-09-6128-s001.pdf [file oncotarget-09-6128-s001.pdf]

## Drp1/Fis1 interaction mediates mitochondrial dysfunction, bioenergetic failure and cognitive decline in Alzheimer's disease

### SUPPLEMENTARY MATERIALS

Supplementary Table 1: List of antibodies used in the study

| Antibody                         | Source                        | Dilution | Catalog no. |
|----------------------------------|-------------------------------|----------|-------------|
| Anti-Drp1                        | BD Transduction Laboratories™ | 1:1000   | 611113      |
| Anti-Mff                         | Proteintech                   | 1:1000   | 17090-1-AP  |
| Anti-Mid49                       | Proteintech                   | 1:1000   | 16413-1-AP  |
| Anti-Mid51                       | Proteintech                   | 1:1000   | 20164-1-AP  |
| Anti-Fis1                        | Proteintech                   | 1:1000   | 10956-1-AP  |
| Anti-cytochrome C                | BD Pharmingen™                | 1:1500   | 556432      |
| Anti-VDAC                        | Abcam                         | 1:2000   | 14734       |
| Anti-β-actin                     | Cell Signaling Technology     | 1:2000   | 3700        |
| Anti-TOM20                       | Santa Cruz Biotechnology      | 1:1000   | sc-11415    |
| Anti-TIM17                       | Santa Cruz Biotechnology      | 1:500    | sc-271152   |
| Anti-Enolase                     | Santa Cruz Biotechnology      | 1:1500   | sc-15343    |
| Anti-phospho Drp1 ser 637        | Cell Signaling Technology     | 1:500    | 3455        |
| Anti-phospho Drp1 ser 617        | Cell Signaling Technology     | 1:500    | 4867        |
| Anti-p62                         | Abcam                         | 1:1000   | 56416       |
| Anti-Beclin-1                    | Cell Signaling Technology     | 1:1000   | 3738        |
| Anti-ATG5                        | Cell Signaling Technology     | 1:500    | 2630        |
| Anti-ATG3                        | Cell Signaling Technology     | 1:500    | 3415        |
| Anti-LC3BII                      | Cell Signaling Technology     | 1:1000   | 3868        |
| Anti-LAMP1                       | Cell Signaling Technology     | 1:500    | 9091        |
| Anti-CathB                       | Abcam                         | 1:500    | ab58802     |
| Anti-CathD                       | Abcam                         | 1:500    | ab75852     |
| Anti-cleaved caspase 3           | Cell Signaling Technology     | 1:250    | 9661        |
| Anti-phospho JNK                 | Cell Signaling Technology     | 1:500    | 9252        |
| Anti FL-APP                      | Cell Signaling Technology     | 1:1000   | 2450        |
| anti-β-Amyloid Precursor Protein | Invitrogen                    | 1:1000   | 51-2700     |
| Anti-BACE1                       | Cell Signaling Technology     | 1:1000   | 5606        |
| Anti-Mfn2                        | Proteintech                   | 1:500    | 12186-1-AP  |
| Anti-Opa1                        | Santa Cruz Biotechnology      | 1:500    | sc-393296   |
